# Supplementary material for: Efficacy of Live Attenuated Vaccine and Commercially Available Lectin against Avian Pathogenic E. coli Infection in Broiler Chickens
Source: PubMed Central journal article supplement (PMC7355798; doi:10.3390/vetsci7020065), 2020-05-13
Supplement: vetsci-07-00065-s001.pdf [file vetsci-07-00065-s001.pdf]

**Table S1.** Weekly body weights, feed intake, body weight gain and feed conversion ratio of experimental groups.

| Group <sup>1</sup> | Age <sup>2</sup>      |                 |              |      |                       |                 |              |      |                        |                 |              |      |                           |                 |              |      |
|--------------------|-----------------------|-----------------|--------------|------|-----------------------|-----------------|--------------|------|------------------------|-----------------|--------------|------|---------------------------|-----------------|--------------|------|
|                    | Week 1                |                 |              |      | Week 2                |                 |              |      | Week 3                 |                 |              |      | Week 4                    |                 |              |      |
|                    | BWT (g)               | Feed intake (g) | BWT gain (g) | FCR  | BWT (g)               | Feed intake (g) | BWT gain (g) | FCR  | BWT (g)                | Feed intake (g) | BWT gain (g) | FCR  | BWT (g)                   | Feed intake (g) | BWT gain (g) | FCR  |
| NC                 | 182 ± 12 <sup>a</sup> | 135             | 133          | 1.01 | 466 ± 30 <sup>a</sup> | 358             | 284          | 1.26 | 825 ± 66 <sup>a</sup>  | 535             | 359          | 1.49 | 1326 ± 110 <sup>a</sup>   | 751             | 501          | 1.50 |
| CBL-V              | 183 ± 17 <sup>a</sup> | 138             | 134          | 1.03 | 475 ± 43 <sup>a</sup> | 365             | 292          | 1.25 | 841 ± 72 <sup>a</sup>  | 534             | 366          | 1.46 | 1347 ± 113 <sup>a</sup>   | 759             | 506          | 1.50 |
| CBL-V/O78-C        | 183 ± 15 <sup>a</sup> | 136             | 133          | 1.02 | 479 ± 40 <sup>a</sup> | 373             | 296          | 1.26 | 810 ± 103 <sup>a</sup> | 490             | 331          | 1.48 | 1231 ± 94 <sup>ab</sup>   | 716             | 421          | 1.70 |
| CBL-V/O125-C       | 186 ± 13 <sup>a</sup> | 140             | 138          | 1.01 | 469 ± 38 <sup>a</sup> | 360             | 283          | 1.27 | 806 ± 88 <sup>a</sup>  | 505             | 337          | 1.50 | 964 ± 149 <sup>abc</sup>  | 395             | 158          | 2.50 |
| Lector+O78-C       | 178 ± 14 <sup>a</sup> | 129             | 129          | 1.00 | 461 ± 34 <sup>a</sup> | 354             | 283          | 1.25 | 810 ± 79 <sup>a</sup>  | 481             | 349          | 1.38 | 1227 ± 120 <sup>ab</sup>  | 667             | 417          | 1.60 |
| Lector+O125-C      | 179 ± 12 <sup>a</sup> | 131             | 131          | 1.00 | 463 ± 34 <sup>a</sup> | 359             | 284          | 1.26 | 857 ± 60 <sup>a</sup>  | 539             | 394          | 1.37 | 1207 ± 138 <sup>ab</sup>  | 543             | 350          | 1.55 |
| PC- O78            | 184 ± 15 <sup>a</sup> | 137             | 137          | 1.00 | 465 ± 45 <sup>a</sup> | 353             | 281          | 1.25 | 789 ± 103 <sup>a</sup> | 495             | 324          | 1.53 | 870 ± 158 <sup>abcd</sup> | 324             | 81           | 4.00 |
| PC- O125           | 177 ± 25 <sup>a</sup> | 130             | 130          | 1.00 | 466 ± 56 <sup>a</sup> | 364             | 289          | 1.26 | 851 ± 84 <sup>a</sup>  | 578             | 385          | 1.50 | 940 ± 108 <sup>abc</sup>  | 310             | 89           | 3.48 |

<sup>1</sup> Groups: NC; Negative control, CBL-V; vaccinated none challenged, CBL-V/O78-C; Vaccinated challenged with *E. coli* O78, CBL-V/O125-C; Vaccinated challenged with *E. coli* O125, Lector+O78-C; Lector 3 days before challenge with *E. coli* O78, Lector+O125-C; Lector 3 days before challenge with *E. coli* O125, PC- O78; Positive control *E. coli* O78 challenge, PC- O125; Positive control *E. coli* O125 challenge. <sup>2</sup> BWT; Bodyweight expressed as mean ± standard deviation, FCR; feed conversion ratio
